# Supplementary material for: Identification of Down-Regulated Proteome in Saccharomyces cerevisiae with the Deletion of Yeast Cathepsin D in Response to Nitrogen Stress
Source: MDPI journal article supplement (doi:10.3390/microorganisms7080214), 2019-07-24
Supplement: s1 [file s1]

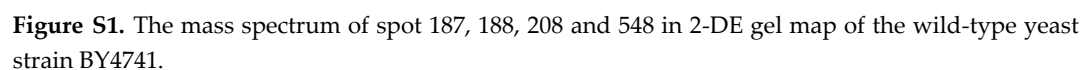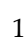

**Figure S2.** Enzyme specific activity of three identified down-regulated glycolytic metabolism enzymes in pep4 $\Delta$  strain comparing with the BY4741 (WT). The data represent means  $\pm$  S.D. ( $n = 3$ ). \*  $p < 0.05$ , \*\*  $p < 0.01$  compared to BY4741.
